# Supplementary material
Source: PubMed Central journal article supplement (PMC2761750)
Supplement: NIHMS145398-supplement-Suppl_Data.pdf [file NIHMS145398-supplement-Suppl_Data.pdf]

**Evaluation of Different Virtual Screening Programs  
for Docking in a Charged Binding Pocket**

Wei Deng, Christophe L. M. J. Verlinde

Department of Biochemistry, University of Washington,  
Seattle, WA 98195-7742, USA.

Supporting Information:

*Table S1. Results of docking binders and non-binders to CCPW191G, using FRED with Chemgauss3 scoring function. Non-binders are label with “-NB”.*

(\*: Chemgauss3 unable to assign atom types, due to the small number of heavy atoms. Therefore their score do not include contributions other than steric interactions.)

| With HOH308                            |             | Without HOH308                         |             |
|----------------------------------------|-------------|----------------------------------------|-------------|
| Name                                   | Total Score | Name                                   | Total Score |
| benzimidazole                          | -51.40      | benzimidazole                          | -52.82      |
| 2,5-diaminopyridine hydrochloride      | -50.00      | 4-amino-5-imidazole carboxamide-NB     | -51.92      |
| phenol                                 | -49.09      | 2,5-diaminopyridine hydrochloride      | -51.41      |
| 2-iminopiperidine hydrochloride        | -48.49      | 4,5-diaminopyrimidine                  | -51.22      |
| 2,4-diaminopyrimidine                  | -47.97      | indazole-NB                            | -50.75      |
| 3-pyridylcarbinol                      | -47.37      | phenol                                 | -50.47      |
| 2-amino-5-methylpyridine               | -47.32      | 4-aminopyridine                        | -49.88      |
| 4-aminopyridine                        | -47.29      | 3,4-diaminopyridine                    | -49.31      |
| 4-amino-5-imidazole carboxamide-NB     | -47.21      | 2-amino-5-methylpyridine               | -48.70      |
| 3,4-diaminopyridine                    | -46.63      | 2-iminopiperidine hydrochloride        | -47.83      |
| 4-pyridylcarbinol                      | -46.39      | 1-methyl-1,6-dihydropyridin-3-amine    | -47.64      |
| cyclopentylamine                       | -45.80      | 2-amino-4-methylpyridine               | -47.61      |
| 4-aminopyrimidine                      | -45.61      | imidazo[1,2-a]pyridine                 | -47.48      |
| 3-aminopyridine                        | -45.60      | cyclopentylamine                       | -47.37      |
| 4-aminoresorcinol hydrochloride-NB     | -45.32      | 3-aminopyridine                        | -47.34      |
| 3-cyanopyridine-NB                     | -45.25      | 3,5-difluoroaniline-NB                 | -47.11      |
| benzylamine                            | -45.15      | benzylamine                            | -47.00      |
| 1-vinylimidazole                       | -45.03      | 2,4-diaminopyrimidine                  | -46.89      |
| 3-methylthiazole                       | -45.00      | 3-cyanopyridine-NB                     | -46.34      |
| toluene-NB                             | -44.75      | 1-vinylimidazole                       | -46.29      |
| 3-fluorocatechol                       | -44.31      | 3-pyridylcarbinol                      | -45.76      |
| indazole-NB                            | -44.16      | aniline                                | -45.72      |
| 2,6-diaminopyridine                    | -44.05      | 4-pyridylcarbinol                      | -45.71      |
| 3,5-difluoroaniline-NB                 | -44.01      | 4-aminoresorcinol hydrochloride-NB     | -45.64      |
| 2-ethylimidazole                       | -43.76      | 2-amino-5-methylthiazole               | -45.15      |
| aniline                                | -43.54      | 3-fluorocatechol                       | -45.02      |
| 2-cyanoaniline-NB                      | -43.54      | toluene-NB                             | -44.92      |
| 2-thiolpyrimidine-NB                   | -43.23      | 2-cyanoaniline-NB                      | -44.86      |
| 1H-imidazol-2-ylmethanol hydrochloride | -43.22      | 2-ethylimidazole                       | -44.60      |
| 2-aminothiazole                        | -43.20      | 2-thiolpyrimidine-NB                   | -44.39      |
| 1-methylimidazole                      | -42.23      | 1H-imidazol-2-ylmethanol hydrochloride | -44.34      |
| imidazo[1,2-a]pyridine                 | -42.15      | 4-aminopyrimidine                      | -44.19      |
| 2-thiolimidazole-NB                    | -41.80      | 2-aminothiazole                        | -44.04      |
| 1-methyl-1,6-dihydropyridin-3-amine    | -41.56      | 2,6-diaminopyridine                    | -43.75      |
| 3-chlorophenol-NB                      | -41.41      | 1,2-dimethylimidazole                  | -43.72      |
| indoline                               | -41.31      | pyridine                               | -43.66      |
| 2-amino-4-methylpyridine               | -40.78      | 1-methylimidazole                      | -43.49      |
| pyridine                               | -40.53      | 3-chlorophenol-NB                      | -43.27      |
| 4-methylimidazole                      | -40.42      | 2-aminopyridine                        | -43.10      |
| 2-methylimidazole                      | -40.34      | indoline                               | -42.21      |
| 2-amino-5-methylthiazole               | -40.31      | isoniazide-NB                          | -41.75      |
| isoniazide-NB                          | -40.17      | 2-thiolimidazole-NB                    | -41.39      |
| 4,5-diaminopyrimidine                  | -39.59      | 2-methylimidazole                      | -40.83      |
| 3-methylthiazole                       | -39.30      | imidazole                              | -40.64      |

|                                      |        |                                      |        |
|--------------------------------------|--------|--------------------------------------|--------|
| 3-thienylmethylamine                 | -38.44 | 3-methylthiazole                     | -40.12 |
| 1,2-dimethylimidazole                | -38.31 | 2-ethyl-4-methylimidazole            | -39.86 |
| imidazole                            | -38.19 | 4-methylimidazole                    | -39.77 |
| 3,4-dimethylthiazole                 | -37.70 | 3,4,5-trimethylthiazole              | -39.66 |
| pyrazole-NB                          | -37.42 | 3-thienylmethylamine                 | -39.26 |
| 3-aminopyrazole-NB                   | -36.98 | 3,4-dimethylthiazole                 | -39.04 |
| 3-thiophenecarboxamide hydrochloride | -36.70 | 2-amino-4-methylthiazole             | -39.03 |
| Quinoline                            | -35.46 | 3-thiophenecarboxamide hydrochloride | -37.94 |
| 3-amino-4-cyanopyrazole-NB           | -35.38 | 2,3,4-trimethylthiazole              | -37.85 |
| 2-ethyl-4-methylimidazole            | -31.40 | pyrazole-NB                          | -37.82 |
| tetrazole-NB                         | -31.37 | 3-aminopyrazole-NB                   | -37.70 |
| 3,4,5-trimethylthiazole              | -31.30 | Quinoline                            | -37.27 |
| 2,3,4-trimethylthiazole              | -30.94 | 3-amino-4-cyanopyrazole-NB           | -35.98 |
| 2-amino-4-methylthiazole             | -28.41 | tetrazole-NB                         | -31.36 |
| dimethylammonium-NB                  | -19.30 | dimethylammonium-NB                  | -19.92 |
| methylammonium-NB                    | -8.84  | methylammonium-NB                    | -15.07 |

Table S2 Results of docking binders and non-binders to CCPW191G, using FRED with Zapbind scoring function. Non-binders are label with “-NB”.

| With HOH308                            |             | Without HOH308                         |             |
|----------------------------------------|-------------|----------------------------------------|-------------|
| Name                                   | Total Score | Name                                   | Total Score |
| 2-amino-5-methylthiazole               | -21.63      | 2-amino-5-methylthiazole               | -23.06      |
| benzimidazole                          | -20.61      | benzimidazole                          | -20.21      |
| 1-methyl-1,6-dihydropyridin-3-amine    | -19.40      | 2-aminothiazole                        | -19.43      |
| 4-methylimidazole                      | -18.67      | 3-methylthiazole                       | -19.01      |
| 3-methylthiazole                       | -18.65      | 4-methylimidazole                      | -18.79      |
| 2-aminothiazole                        | -18.44      | Quinoline                              | -18.29      |
| dimethylammonium-NB                    | -18.06      | 3-methylthiazole                       | -18.22      |
| Quinoline                              | -17.99      | dimethylammonium-NB                    | -17.86      |
| 3-methylthiazole                       | -17.30      | imidazo[1,2-a]pyridine                 | -17.71      |
| 2-ethylimidazole                       | -17.28      | 2-ethylimidazole                       | -17.56      |
| 2-ethyl-4-methylimidazole              | -17.21      | 2-ethyl-4-methylimidazole              | -17.05      |
| aniline                                | -16.60      | aniline                                | -16.80      |
| 2-methylimidazole                      | -16.24      | 2-amino-5-methylpyridine               | -16.26      |
| 2-amino-5-methylpyridine               | -16.13      | 2-methylimidazole                      | -16.05      |
| methylammonium-NB                      | -15.81      | 2,3,4-trimethylthiazole                | -15.99      |
| 3-thienylmethylamine                   | -15.57      | indoline                               | -15.88      |
| indoline                               | -15.51      | 3-thienylmethylamine                   | -15.59      |
| benzylamine                            | -15.50      | benzylamine                            | -15.40      |
| imidazole                              | -15.23      | imidazole                              | -15.32      |
| 1-methylimidazole                      | -15.13      | 1H-imidazol-2-ylmethanol hydrochloride | -15.11      |
| 1H-imidazol-2-ylmethanol hydrochloride | -15.07      | 1-methylimidazole                      | -15.07      |
| 1,2-dimethylimidazole                  | -14.52      | 2,5-diaminopyridine hydrochloride      | -14.79      |
| 2-aminopyridine                        | -13.34      | 1,2-dimethylimidazole                  | -14.64      |
| 2,3,4-trimethylthiazole                | -12.40      | 2-amino-4-methylthiazole               | -14.60      |
| 2-amino-4-methylthiazole               | -12.08      | methylammonium-NB                      | -14.22      |
| 1-vinylimidazole                       | -10.34      | 2-aminopyridine                        | -13.40      |
| imidazo[1,2-a]pyridine                 | -10.07      | 3,4,5-trimethylthiazole                | -12.74      |
| 3-thiophenecarboxamide hydrochloride   | -9.25       | 3-pyridylcarbinol                      | -12.54      |
| 2,5-diaminopyridine hydrochloride      | -9.16       | 2,6-diaminopyridine                    | -12.43      |
| 2,6-diaminopyridine                    | -7.85       | 1-methyl-1,6-dihydropyridin-3-amine    | -11.58      |
| 3,4-dimethylthiazole                   | -7.72       | 2-amino-4-methylpyridine               | -11.31      |
| 4-aminopyrimidine                      | -7.50       | 3-thiophenecarboxamide hydrochloride   | -10.35      |
| pyridine                               | -7.34       | 1-vinylimidazole                       | -10.18      |
| 4,5-diaminopyrimidine                  | -7.21       | 3,4-diaminopyridine                    | -9.15       |
| 2,4-diaminopyrimidine                  | -5.05       | 2-iminopiperidine hydrochloride        | -9.04       |
| 3-aminopyrazole-NB                     | -4.93       | 3-aminopyridine                        | -8.98       |
| 3,4,5-trimethylthiazole                | -4.09       | 3,4-dimethylthiazole                   | -8.04       |
| 2-iminopiperidine hydrochloride        | -3.58       | pyridine                               | -7.96       |
| phenol                                 | -2.50       | 3,5-difluoroaniline-NB                 | -7.18       |

|                                    |       |                                    |       |
|------------------------------------|-------|------------------------------------|-------|
| 2-amino-4-methylpyridine           | -2.31 | 3-aminopyrazole-NB                 | -5.40 |
| 3,5-difluoroaniline-NB             | -2.03 | 2,4-diaminopyrimidine              | -5.04 |
| tetrazole-NB                       | -0.42 | 4,5-diaminopyrimidine              | -3.16 |
| cyclopentylamine                   | -0.25 | phenol                             | -2.94 |
| 2-cyanoaniline-NB                  | -0.24 | 3-fluorocatechol                   | -2.65 |
| 2-thiolimidazole-NB                | -0.04 | tetrazole-NB                       | -1.61 |
| 3-aminopyridine                    | 0.24  | 2-thiolimidazole-NB                | -1.31 |
| toluene-NB                         | 0.61  | pyrazole-NB                        | -1.10 |
| 4-amino-5-imidazole carboxamide-NB | 0.72  | 2-cyanoaniline-NB                  | -0.58 |
| 3-pyridylcarbinol                  | 1.08  | toluene-NB                         | -0.26 |
| pyrazole-NB                        | 1.25  | 4-pyridylcarbinol                  | 1.53  |
| 3-chlorophenol-NB                  | 1.74  | 4-aminopyridine                    | 1.66  |
| 4-aminopyridine                    | 2.20  | 3-cyanopyridine-NB                 | 1.92  |
| indazole-NB                        | 2.43  | isoniazide-NB                      | 2.52  |
| 3-cyanopyridine-NB                 | 3.18  | 3-chlorophenol-NB                  | 2.94  |
| isoniazide-NB                      | 3.65  | indazole-NB                        | 3.18  |
| 2-thiolpyrimidine-NB               | 5.12  | 2-thiolpyrimidine-NB               | 3.61  |
| 4-pyridylcarbinol                  | 6.88  | 4-amino-5-imidazole carboxamide-NB | 7.45  |
| 3-fluorocatechol                   | 8.32  | 4-aminopyrimidine                  | 8.05  |
| 4-aminoresorcinol hydrochloride-NB | 13.55 | 3-amino-4-cyanopyrazole-NB         | 9.59  |
| 3-amino-4-cyanopyrazole-NB         | 14.58 | 4-aminoresorcinol hydrochloride-NB | 10.73 |

Table S3 Results of docking binders and non-binders to CCPW191G, using QXP/FLO. Non-binders are label with “-NB”.

| With HOH308                            |             | Without HOH308                         |             |
|----------------------------------------|-------------|----------------------------------------|-------------|
| Name                                   | Total Score | Name                                   | Total Score |
| 3-pyridylcarbinol                      | -50.80      | 3-pyridylcarbinol                      | -49.20      |
| cyclopentylamine                       | -49.10      | 2,5-diaminopyridine hydrochloride      | -47.50      |
| 2,5-diaminopyridine hydrochloride      | -48.40      | 2-amino-5-methylpyridine               | -46.60      |
| 2-amino-5-methylpyridine               | -46.90      | 2-iminopiperidine hydrochloride        | -46.10      |
| 3,4-diaminopyridine                    | -46.80      | 4-pyridylcarbinol                      | -45.70      |
| 2-iminopiperidine hydrochloride        | -46.30      | 2-amino-5-methylthiazole               | -45.50      |
| 2,6-diaminopyridine                    | -45.80      | 3-thienylmethylamine                   | -43.90      |
| 3-thienylmethylamine                   | -44.90      | 2-aminopyridine                        | -43.70      |
| benzimidazole                          | -43.90      | imidazo[1,2-a]pyridine                 | -43.30      |
| 4-aminopyridine                        | -43.90      | 2,6-diaminopyridine                    | -42.90      |
| benzylamine                            | -43.90      | benzimidazole                          | -41.90      |
| 2-aminopyridine                        | -43.70      | 3,4-diaminopyridine                    | -41.90      |
| imidazo[1,2-a]pyridine                 | -43.70      | 3-aminopyridine                        | -41.70      |
| 2-aminothiazole                        | -43.50      | 2-aminothiazole                        | -41.60      |
| 3-aminopyridine                        | -42.60      | 4-aminopyridine                        | -39.70      |
| 2-amino-5-methylthiazole               | -42.60      | imidazo[1,2-a]pyridine                 | -39.70      |
| 1H-imidazol-2-ylmethanol hydrochloride | -42.50      | 2,4-diaminopyrimidine                  | -39.60      |
| 2,4-diaminopyrimidine                  | -42.40      | cyclopentylamine                       | -39.40      |
| 4-aminopyrimidine                      | -42.30      | 2-amino-4-methylpyridine               | -39.20      |
| 4,5-diaminopyrimidine                  | -42.20      | pyridine                               | -38.20      |
| 4-pyridylcarbinol                      | -41.40      | 1H-imidazol-2-ylmethanol hydrochloride | -38.00      |
| dimethylammonium-NB                    | -41.20      | 1-vinylimidazole                       | -37.70      |
| 2-amino-4-methylpyridine               | -40.90      | 2-amino-4-methylthiazole               | -37.40      |
| 1-vinylimidazole                       | -40.00      | 3-thiophenecarboxamide hydrochloride   | -36.60      |
| 1,2-dimethylimidazole                  | -39.50      | 1,2-dimethylimidazole                  | -36.40      |
| methylammonium-NB                      | -39.40      | 4-aminopyrimidine                      | -36.30      |
| 4-methylimidazole                      | -38.80      | 4-methylimidazole                      | -35.70      |
| pyridine                               | -38.50      | 4,5-diaminopyrimidine                  | -35.50      |
| 2-ethyl-4-methylimidazole              | -38.40      | 1-methylimidazole                      | -34.70      |
| 2-amino-4-methylthiazole               | -38.20      | 2-ethyl-4-methylimidazole              | -34.50      |
| 3-thiophenecarboxamide hydrochloride   | -37.80      | 2-methylimidazole                      | -34.10      |
| 2-ethylimidazole                       | -36.90      | 2-ethylimidazole                       | -34.10      |
| 1-methylimidazole                      | -36.20      | dimethylammonium-NB                    | -33.70      |
| 2-methylimidazole                      | -35.40      | 1-methyl-1,6-dihydropyridin-3-amine    | -31.60      |
| 1-methyl-1,6-dihydropyridin-3-amine    | -34.50      | imidazole                              | -31.00      |
| 3-methylthiazole                       | -34.10      | methylammonium-NB                      | -30.50      |
| imidazole                              | -32.60      | 3-methylthiazole                       | -30.10      |
| Quinoline                              | -32.20      | 3,4-dimethylthiazole                   | -29.80      |
| 4-aminoresorcinol hydrochloride-NB     | -28.60      | 4-aminoresorcinol hydrochloride-NB     | -29.50      |
| 3-aminopyrazole-NB                     | -27.90      | 3-fluorocatechol                       | -27.10      |
| 3,4-dimethylthiazole                   | -27.50      | 4-amino-5-imidazole carboxamide-NB     | -26.30      |

|                                    |        |                            |        |
|------------------------------------|--------|----------------------------|--------|
| phenol                             | -26.70 | phenol                     | -26.10 |
| aniline                            | -25.50 | 3-aminopyrazole-NB         | -26.10 |
| 3-fluorocatechol                   | -25.20 | 3-amino-4-cyanopyrazole-NB | -25.50 |
| 3-amino-4-cyanopyrazole-NB         | -24.30 | Quinoline                  | -25.40 |
| tetrazole-NB                       | -23.60 | aniline                    | -25.00 |
| 4-amino-5-imidazole carboxamide-NB | -23.00 | 3,5-difluoroaniline-NB     | -24.60 |
| 3,4,5-trimethylthiazole            | -22.50 | 3,4,5-trimethylthiazole    | -24.50 |
| 3,5-difluoroaniline-NB             | -21.70 | tetrazole-NB               | -21.20 |
| 3-cyanopyridine-NB                 | -21.50 | 3-cyanopyridine-NB         | -20.30 |
| pyrazole-NB                        | -21.10 | 3-chlorophenol-NB          | -19.70 |
| indazole-NB                        | -21.10 | indazole-NB                | -19.60 |
| 3-chlorophenol-NB                  | -21.00 | pyrazole-NB                | -19.20 |
| toluene-NB                         | -19.80 | toluene-NB                 | -19.00 |
| 2,3,4-trimethylthiazole            | -18.90 | 2,3,4-trimethylthiazole    | -18.10 |
| 2-cyanoaniline-NB                  | -17.90 | 2-cyanoaniline-NB          | -17.80 |
| indoline                           | -15.80 | 2-thiolimidazole-NB        | -14.30 |
| 2-thiolimidazole-NB                | -10.20 | indoline                   | -13.40 |
| 2-thiopyrimidine-NB                | -6.60  | 2-thiopyrimidine-NB        | -11.00 |
| isoniazide-NB                      | 6.20   | isoniazide-NB              | 7.50   |



Table S4 Results of docking binders and non-binders to CCPW191G, using GLIDE with Standard Precision Scoring Function. *Non-binders are label with “-NB”.*

| With HOH308                            |             | Without HOH308                         |             |
|----------------------------------------|-------------|----------------------------------------|-------------|
| Name                                   | Total Score | Name                                   | Total Score |
| benzylamine                            | -7.17       | 3-thiophenecarboxamide hydrochloride   | -7.60       |
| 4-pyridylcarbinol                      | -7.13       | isoniazide-NB                          | -7.49       |
| 3-thiophenecarboxamide hydrochloride   | -7.03       | benzylamine                            | -7.19       |
| 2-iminopiperidine hydrochloride        | -6.83       | 3-fluorocatechol                       | -7.13       |
| 4-aminoresorcinol hydrochloride-NB     | -6.82       | 4-aminoresorcinol hydrochloride-NB     | -7.11       |
| 4-amino-5-imidazole carboxamide-NB     | -6.77       | 3-thienylmethylamine                   | -7.04       |
| isoniazide-NB                          | -6.72       | 4-pyridylcarbinol                      | -6.80       |
| 1H-imidazol-2-ylmethanol hydrochloride | -6.66       | 4-amino-5-imidazole carboxamide-NB     | -6.80       |
| 2-amino-4-methylpyridine               | -6.62       | 2-thiolimidazole-NB                    | -6.70       |
| 3-pyridylcarbinol                      | -6.62       | 3,4-diaminopyridine                    | -6.59       |
| 2-thiolimidazole-NB                    | -6.42       | 2-iminopiperidine hydrochloride        | -6.59       |
| 3-thienylmethylamine                   | -6.41       | 2,6-diaminopyridine                    | -6.55       |
| 3-aminopyridine                        | -6.32       | 3-pyridylcarbinol                      | -6.55       |
| 2,5-diaminopyridine hydrochloride      | -6.28       | 2-amino-4-methylpyridine               | -6.48       |
| cyclopentylamine                       | -6.19       | cyclopentylamine                       | -6.35       |
| 1-vinylimidazole                       | -6.18       | 2,5-diaminopyridine hydrochloride      | -6.32       |
| 3-fluorocatechol                       | -6.18       | 3-aminopyridine                        | -6.21       |
| imidazo[1,2-a]pyridine                 | -6.14       | 1-vinylimidazole                       | -6.20       |
| 2-aminopyridine                        | -6.11       | 1H-imidazol-2-ylmethanol hydrochloride | -6.18       |
| 2,6-diaminopyridine                    | -6.04       | imidazo[1,2-a]pyridine                 | -6.16       |
| 2-amino-5-methylpyridine               | -6.03       | 2-aminopyridine                        | -6.11       |
| 1-methyl-1,6-dihydropyridin-3-amine    | -6.02       | 2-amino-5-methylpyridine               | -6.06       |
| benzimidazole                          | -5.93       | 1-methyl-1,6-dihydropyridin-3-amine    | -6.05       |
| 2-ethylimidazole                       | -5.91       | 2-ethylimidazole                       | -6.01       |
| 4-methylimidazole                      | -5.90       | benzimidazole                          | -6.01       |
| 3,4-diaminopyridine                    | -5.89       | 4-aminopyridine                        | -5.97       |
| 3,4,5-trimethylthiazole                | -5.89       | indazole-NB                            | -5.88       |
| 4-aminopyridine                        | -5.87       | 4-methylimidazole                      | -5.88       |
| 2,3,4-trimethylthiazole                | -5.84       | 3,4,5-trimethylthiazole                | -5.87       |
| indoline                               | -5.84       | 2,3,4-trimethylthiazole                | -5.84       |
| indazole-NB                            | -5.83       | indoline                               | -5.77       |
| 3-cyanopyridine-NB                     | -5.78       | 2-methylimidazole                      | -5.75       |
| 3,5-difluoroaniline-NB                 | -5.74       | pyridine                               | -5.73       |
| 2-methylimidazole                      | -5.73       | 3,5-difluoroaniline-NB                 | -5.70       |
| pyridine                               | -5.71       | 3-chlorophenol-NB                      | -5.69       |
| 3-chlorophenol-NB                      | -5.65       | 1,2-dimethylimidazole                  | -5.69       |
| 1,2-dimethylimidazole                  | -5.61       | 2-cyanoaniline-NB                      | -5.68       |
| imidazole                              | -5.61       | 2-ethyl-4-methylimidazole              | -5.67       |
| 2-ethyl-4-methylimidazole              | -5.59       | imidazole                              | -5.60       |
| 4,5-diaminopyrimidine                  | -5.57       | 3,4-dimethylthiazole                   | -5.57       |

|                            |       |                            |       |
|----------------------------|-------|----------------------------|-------|
| 2-cyanoaniline-NB          | -5.54 | 2,4-diaminopyrimidine      | -5.55 |
| 3,4-dimethylthiazole       | -5.51 | 2-amino-5-methylthiazole   | -5.53 |
| 2,4-diaminopyrimidine      | -5.49 | phenol                     | -5.52 |
| aniline                    | -5.47 | aniline                    | -5.51 |
| 2-amino-5-methylthiazole   | -5.46 | 4,5-diaminopyrimidine      | -5.51 |
| phenol                     | -5.45 | 3-amino-4-cyanopyrazole-NB | -5.46 |
| 2-amino-4-methylthiazole   | -5.40 | 2-thiolpyrimidine-NB       | -5.43 |
| 3-amino-4-cyanopyrazole-NB | -5.40 | 3-cyanopyridine-NB         | -5.42 |
| 2-thiolpyrimidine-NB       | -5.35 | 3-aminopyrazole-NB         | -5.40 |
| Quinoline                  | -5.34 | 2-amino-4-methylthiazole   | -5.38 |
| 1-methylimidazole          | -5.22 | 1-methylimidazole          | -5.29 |
| 3-methylthiazole           | -5.07 | 2-aminothiazole            | -5.17 |
| 3-aminopyrazole-NB         | -5.03 | Quinoline                  | -5.15 |
| 2-aminothiazole            | -5.02 | 3-methylthiazole           | -5.13 |
| 4-aminopyrimidine          | -5.00 | 4-aminopyrimidine          | -5.05 |
| toluene-NB                 | -4.80 | methylammonium-NB          | -4.97 |
| dimethylammonium-NB        | -4.78 | toluene-NB                 | -4.83 |
| methylammonium-NB          | -4.64 | dimethylammonium-NB        | -4.80 |
| pyrazole-NB                | -4.37 | pyrazole-NB                | -4.41 |
| tetrazole-NB               | -3.91 | tetrazole-NB               | -4.04 |

Table S5 Results of docking binders and non-binders to CCPW191G, using GLIDE with Extra Precision Scoring Function. *Non-binders are label with “-NB”.*

| With HOH308                          |             | Without HOH308                       |             |
|--------------------------------------|-------------|--------------------------------------|-------------|
| Name                                 | Total Score | Name                                 | Total Score |
| benzylamine                          | -8.00       | 3-fluorocatechol                     | -7.33       |
| 3-fluorocatechol                     | -7.43       | 4-pyridylcarbinol                    | -7.29       |
| 4-pyridylcarbinol                    | -7.36       | 1-methyl-1,6-dihydropyridin-3-amine  | -7.23       |
| 2-amino-5-methylpyridine             | -7.16       | 3-pyridylcarbinol                    | -7.21       |
| 3,4-diaminopyridine                  | -7.06       | 2-amino-4-methylpyridine             | -7.14       |
| 2,5-diaminopyridine hydrochloride    | -6.77       | 2-amino-5-methylpyridine             | -7.10       |
| 3-aminopyridine                      | -6.76       | benzylamine                          | -7.01       |
| 2-aminopyridine                      | -6.73       | 3-thienylmethylamine                 | -6.92       |
| 3-chlorophenol-NB                    | -6.72       | 4-aminoresorcinol hydrochloride-NB   | -6.91       |
| indazole-NB                          | -6.70       | 2-aminopyridine                      | -6.75       |
| 2,6-diaminopyridine                  | -6.68       | 3-aminopyridine                      | -6.75       |
| cyclopentylamine                     | -6.62       | 2,5-diaminopyridine hydrochloride    | -6.75       |
| isoniazide-NB                        | -6.62       | 3-chlorophenol-NB                    | -6.68       |
| 4-aminoresorcinol hydrochloride-NB   | -6.55       | indazole-NB                          | -6.64       |
| 2-amino-4-methylpyridine             | -6.51       | isoniazide-NB                        | -6.63       |
| 3-thiophenecarboxamide hydrochloride | -6.45       | 2,6-diaminopyridine                  | -6.59       |
| Quinoline                            | -6.41       | 2-cyanoaniline-NB                    | -6.41       |
| indoline                             | -6.40       | indoline                             | -6.36       |
| aniline                              | -6.17       | 3-thiophenecarboxamide hydrochloride | -6.24       |
| 2-iminopiperidine hydrochloride      | -6.15       | Quinoline                            | -6.17       |
| 3,5-difluoroaniline-NB               | -6.13       | 3-cyanopyridine-NB                   | -6.06       |
| 3-pyridylcarbinol                    | -6.10       | phenol                               | -6.05       |
| 3-thienylmethylamine                 | -6.09       | aniline                              | -6.05       |
| phenol                               | -6.07       | 4-aminopyridine                      | -5.95       |
| 2-cyanoaniline-NB                    | -6.00       | cyclopentylamine                     | -5.86       |
| 4-aminopyridine                      | -5.90       | 3,4-diaminopyridine                  | -5.81       |
| benzimidazole                        | -5.88       | pyridine                             | -5.79       |
| 1-methyl-1,6-dihydropyridin-3-amine  | -5.74       | 3,5-difluoroaniline-NB               | -5.78       |
| 2-amino-4-methylthiazole             | -5.57       | benzimidazole                        | -5.71       |
| 4-amino-5-imidazole carboxamide-NB   | -5.54       | imidazo[1,2-a]pyridine               | -5.65       |
| toluene-NB                           | -5.46       | toluene-NB                           | -5.51       |
| 1-vinylimidazole                     | -5.27       | 1,2-dimethylimidazole                | -5.49       |
| 2,3,4-trimethylthiazole              | -5.20       | 4-amino-5-imidazole carboxamide-NB   | -5.43       |
| 3,4,5-trimethylthiazole              | -5.18       | 1-vinylimidazole                     | -5.28       |
| 2-amino-5-methylthiazole             | -5.14       | 2-amino-5-methylthiazole             | -5.25       |
| imidazo[1,2-a]pyridine               | -5.13       | 2-amino-4-methylthiazole             | -5.22       |
| imidazo[1,2-a]pyridine               | -5.01       | 3-aminopyrazole-NB                   | -5.17       |
| 3-aminopyrazole-NB                   | -4.95       | 3,4,5-trimethylthiazole              | -5.12       |
| 2-ethyl-4-methylimidazole            | -4.93       | 2,3,4-trimethylthiazole              | -5.12       |
| 4,5-diaminopyrimidine                | -4.90       | imidazo[1,2-a]pyridine               | -5.04       |

|                            |       |                                 |       |
|----------------------------|-------|---------------------------------|-------|
| 3-amino-4-cyanopyrazole-NB | -4.89 | 3-amino-4-cyanopyrazole-NB      | -4.92 |
| 2,4-diaminopyrimidine      | -4.86 | 2-ethylimidazole                | -4.90 |
| 3-cyanopyridine-NB         | -4.82 | 2-ethyl-4-methylimidazole       | -4.88 |
| 2-thiolpyrimidine-NB       | -4.82 | 4,5-diaminopyrimidine           | -4.83 |
| 4-aminopyrimidine          | -4.73 | 2-thiolpyrimidine-NB            | -4.82 |
| 1-methylimidazole          | -4.72 | 4-aminopyrimidine               | -4.79 |
| 3,4-dimethylthiazole       | -4.64 | 1-methylimidazole               | -4.73 |
| 2-ethylimidazole           | -4.62 | 2-aminothiazole                 | -4.73 |
| 2-aminothiazole            | -4.61 | 3,4-dimethylthiazole            | -4.69 |
| pyridine                   | -4.55 | 2,4-diaminopyrimidine           | -4.65 |
| 4-methylimidazole          | -4.55 | 4-methylimidazole               | -4.58 |
| pyrazole-NB                | -4.41 | 2-thiolimidazole-NB             | -4.46 |
| 2-methylimidazole          | -4.40 | pyrazole-NB                     | -4.39 |
| 2-thiolimidazole-NB        | -4.36 | 2-methylimidazole               | -4.39 |
| 1,2-dimethylimidazole      | -4.33 | 3-methylthiazole                | -4.02 |
| imidazole                  | -3.98 | imidazole                       | -3.98 |
| 3-methylthiazole           | -3.98 | 2-iminopiperidine hydrochloride | -3.89 |
| dimethylammonium-NB        | -3.60 | dimethylammonium-NB             | -3.51 |
| tetrazole-NB               | -3.05 | tetrazole-NB                    | -3.04 |
| methylammonium-NB          | -2.95 | methylammonium-NB               | -3.02 |

*Table S6. Binding Site Marker Atoms (colored pink) during QXP/FLO Docking.*

| Residue | Atom      | Coordinates                |
|---------|-----------|----------------------------|
| HIS175  | C (gamma) | (-8.465, 55.895, 108.988)  |
| GLY191  | C (alpha) | (-12.672, 49.299, 108.141) |
| MET230  | S (delta) | (13.473, 51.401, 113.299)  |
| HOH308* | O         | (-9.249, 48.848, 107.796)  |
| HEM     | C         | (-4.195, 51.712, 111.171)  |

\* Removed when docking without HOH308

Table S7 Summary of the 35 crystal structures with bound ligands.

| PDB ID | Ligand Name              | MBC (mM) | Kd (mM) | Ligand Structure                                                                    | Crystal Resolution (Å) | R-value      | R <sub>free</sub> | Ref. |
|--------|--------------------------|----------|---------|-------------------------------------------------------------------------------------|------------------------|--------------|-------------------|------|
| 1AEO   | 2-aminopyridine          | —        | 0.05    | 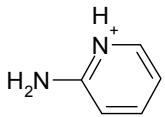   | 2.10                   | —            | —                 | a    |
| 1AEN   | 2-amino-5-methylthiazole | —        | 0.006   |    | 2.10                   | —            | —                 | a    |
| 2AQD   | 2,5-diaminopyridine      | 0.25     | —       |    | 1.35                   | 0.134 (obs.) | 0.163             | b    |
| 2ANZ   | 2,6-diaminopyridine      | —        | 0.06    |   | 1.75                   | 0.192 (obs.) | 0.210             | b    |
| 2EUP   | 2-amino-5-methylpyridine | —        | 0.04    |  | 1.40                   | 0.153 (obs.) | 0.181             | b    |
| 2EUN   | 2,4-diaminopyrimidine    | —        | 0.05    |  | 1.70                   | 0.194 (obs.) | 0.226             | b    |
| 2EUT   | 2-amino-4-methylpyridine | 0.25     | —       |  | 1.12                   | 0.143 (obs.) | 0.152             | b    |
| 1AEK   | indoline                 | —        | 0.16    |  | 2.10                   | —            | —                 | a    |
| 1AEG   | 4-aminopyridine          | —        | 0.04    |  | 2.10                   | —            | —                 | a    |

|      |                                        |      |       |  |      |              |       |   |
|------|----------------------------------------|------|-------|--|------|--------------|-------|---|
| 1AEH | 2-amino-4-methylthiazole               | —    | 0.23  |  | 2.10 | —            | —     | a |
| 1CMP | 1,2-dimethylimidazole                  | —    | 0.027 |  | 1.90 | 0.190 (obs.) | —     | c |
| 2AS2 | 2-iminopiperidine hydrochloride        | 0.13 | —     |  | 1.45 | 0.134 (obs.) | 0.177 | b |
| 2AS1 | 3-thiophenecarboxamide hydrochloride   | —    | 0.02  |  | 1.55 | 0.152 (obs.) | 0.199 | b |
| 1AEQ | 2-ethylimidazole                       | —    | 0.73  |  | 2.10 | —            | —     | a |
| 2EUU | 1H-imidazol-2-ylmethanol hydrochloride | 0.50 | —     |  | 1.45 | 0.146 (obs.) | 0.161 | b |
| 1AEJ | 1-vinylimidazole                       | —    | 0.15  |  | 2.10 | —            | —     | a |
| 1AEU | 2-methylimidazole                      | —    | 0.07  |  | 2.10 | —            | —     | c |
| 2EUR | 4-pyridylcarbinol                      | 0.50 | —     |  | 1.39 | 0.148 (obs.) | 0.171 | b |
| 1AEE | aniline                                | —    | 0.03  |  | 2.10 | —            | —     | a |

|      |                         |      |      |                                                                                     |                                                                                    |                 |                 |       |
|------|-------------------------|------|------|-------------------------------------------------------------------------------------|------------------------------------------------------------------------------------|-----------------|-----------------|-------|
| 2AS3 | phenol                  | —    | 4.1  | 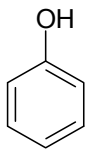   | 1.40                                                                               | 0.144<br>(work) | 0.188           | b     |
| 2EUQ | 3-thienylmethanamine    | —    | 0.05 |    | 1.30                                                                               | 0.147<br>(obs.) | 0.166           | b     |
| 2AS4 | 3-fluorocatechol        | —    | 7.7  |    | 1.30                                                                               | 0.138<br>(work) | 0.175           | b     |
| 2AS6 | cyclopentylamine        | 0.50 | —    |                                                                                     |   | 1.45            | 0.142<br>(work) | 0.183 |
| 1AC4 | 2,3,4-trimethylthiazole | —    | 1.5  |    | 2.10                                                                               | —               | —               | c     |
| 1AET | 1-methylimidazole       | —    | 0.07 |                                                                                     |  | 2.10            | —               | —     |
| 1AC8 | 3,4,5-trimethylthiazole | —    | 0.2  |  | 2.10                                                                               | —               | —               | c     |
| 1AEB | 3-methylthiazole        | —    | 0.3  |  | 2.10                                                                               | —               | —               | a     |
| 1AED | 3,4-dimethylthiazole    | —    | 0.05 |  | 2.10                                                                               | —               | —               | a     |
| 1AES | imidazole               | —    | 0.07 |  | 2.10                                                                               | —               | —               | c     |
| 2EUS | benzylamine             | 0.25 | —    |  | 1.55                                                                               | 0.149<br>(obs.) | 0.178           | b     |



|      |                                     |      |      |                                                                                   |      |              |       |   |
|------|-------------------------------------|------|------|-----------------------------------------------------------------------------------|------|--------------|-------|---|
| 2EUO | 1-methyl-1,6-dihydropyridin-3-amine | 0.25 | —    | 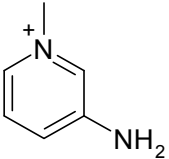 | 1.45 | 0.153 (obs.) | 0.181 | b |
| 1AEM | imidazo[1,2-a]pyridine              | —    | 0.09 |  | 2.10 | —            | —     | a |
| 1RYC | benzimidazole                       | —    | 0.15 |  | 1.80 | 0.163 (obs.) | —     | c |
| 1AEF | 3-aminopyridine                     | —    | 0.05 |  | 2.10 | —            | —     | a |
| 1AEV | 2-aminothiazole                     | —    | 0.04 |  | 2.10 | —            | —     | d |

a = Musah, R.A.; Jensen, G.M.; Bunte, S.W.; Rosenfeld, R.J.; Goodin, D.B. Artificial protein cavities as specific ligand-binding templates: characterization of an engineered heterocyclic cation-binding site that preserves the evolved specificity of the parent protein. *J.Mol.Biol.* **2002**, 315, 845-857.

b = Brenk, R.; Vetter, S.W.; Boyce, S.E.; Goodin, D.B.; Shoichet, B.K. Probing molecular docking in a charged model binding site. *J.Mol.Biol.* **2006**, 357, 1449-1470.

c = Fitzgerald, M.M.; Musah, R.A.; McRee, D.E.; Goodin, D.B. A ligand-gated, hinged loop rearrangement opens a channel to a buried artificial protein cavity. *Nat.Struct.Biol.* **1996**, 3, 626-631.

d = Musah, R.A.; Goodin, D.B. Introduction of novel substrate oxidation into cytochrome c peroxidase by cavity complementation: oxidation of 2-aminothiazole and covalent modification of the enzyme. *Biochemistry* **1997**, 36, 11665-11674.

— = N/A

MBC = Minimum Bactericidal Concentration

(The PDB code, ligand name, MBC, Kd, Ligand structure, are downloaded from Shoichet's laboratory homepage\*. The crystal resolution, R-value, R<sub>free</sub>, references are obtained from PDB website.\*\* The authors have noticed the slight inconsistency of crystal resolutions between the reference and PDB website.

\* Shoichet Laboratory Homepage. University of California, San Francisco: San Francisco, CA, USA. <http://shoichetlab.compbio.ucsf.edu/> (accessed Apr 19, 2007), Under "Take Aways -> CCP binders".

\*\* RCSB PDB web service. <http://www.rcsb.org> (accessed Jun 18, 2008). )
